# Supplementary material
Source: PubMed Central journal article supplement (PMC7906670)

# THE LANCET

## Gastroenterology & Hepatology

### Supplementary appendix

This appendix formed part of the original submission and has been peer reviewed. We post it as supplied by the authors.

This online publication has been corrected. The corrected version first appeared at [thelancet.com/gastrohep](http://thelancet.com/gastrohep) on March 11, 2021.

Supplement to: Sebastian S, Walker GJ, Kennedy NA, et al. Assessment, endoscopy, and treatment in patients with acute severe ulcerative colitis during the COVID-19 pandemic (PROTECT-ASUC): a multicentre, observational, case-control study. *Lancet Gastroenterol Hepatol* 2021; **6**: 271–81.

## **Supplement**

Supplementary Table 1: PROTECT-ASUC study contributors and institutions

Supplementary Table 2: Disease severity indicators

Supplementary Table 3: Table of post-operative complications

Supplementary Table 4: UVA and MVA for composite endpoint of rescue therapy (including primary induction) or surgery using Day 1 and Day 3 variables

Supplementary Table 5: Details of ASUC patients testing positive for COVID-19 during or within 3 months of presentation

Supplementary Table 6: Table of pre-ASUC and post ASUC COVID-19 shielding and risk assessment

Supplementary Figure 1: Study cohorts

Supplementary Figure 2: A. Outcomes in COVID-19 pandemic cohort and B. Historical control cohort

**Supplementary Table 1: PROTECT-ASUC study contributors and institutions**

| <b>Institution</b>                                              | <b>Contributors</b>                                                                                                     |
|-----------------------------------------------------------------|-------------------------------------------------------------------------------------------------------------------------|
| Airedale NHS Foundation Trust                                   | Richard Shenderey<br>Kalyan Peddada<br>Emma Dooks                                                                       |
| Barts Health NHS Trust                                          | James Oliver Lindsay<br>Jennifer Murray<br>Aaron Bancel                                                                 |
| Basildon and Thurrock University Hospitals NHS Foundation Trust | Zia Mazhar<br>Leila Mebarek<br>Aarani Mahalingam<br>Christopher Palmer-Jones<br>Jacqueline Roscoe                       |
| Belfast Health & Social Care Trust                              | Graham Morrison<br>Stephen Boyle                                                                                        |
| Blackpool Teaching Hospitals NHS Foundation Trust               | Rhys Butcher<br>Tom Riley<br>Aye Mya Htun                                                                               |
| Bolton NHS Foundation Trust                                     | Salil Singh<br>Kelly Chatten<br>Ruth Tunney                                                                             |
| Cardiff and Vale University Health Board                        | Barney Hawthorne<br>Bradley Arms-Williams<br>Alexander Berry<br>Janardhan Navaratnam                                    |
| Chelsea and Westminster Hospital NHS Foundation Trust           | Richard Appleby<br>Emma Johnston<br>Sharmili Balarajah<br>Larissa Good<br>Holli Evans                                   |
| County Durham and Darlington NHS Foundation Trust               | Anjan Dhar<br>Susan Ritchie                                                                                             |
| Croydon Health Services NHS Trust                               | Mike Mendall<br>Amy Woods<br>Homira Ayubi                                                                               |
| East Suffolk and North Essex NHS Foundation Trust               | Achuth Shenoy<br>Thomas Hutton<br>Joy Mason<br>Deanna Naylor<br>Kelly Turner                                            |
| East Sussex Healthcare NHS Trust                                | Steven Fong<br>Frederic Cuison<br>Hesam Nooredinwand<br>Sophia Bishop<br>Murad Bayati<br>Muteeb Ashraf<br>Mansoor Zafar |
| Guy's and St Thomas' NHS Foundation Trust                       | Peter Irving<br>Raphael Peter Luber<br>Jennifer Clough<br>Samuel Lim<br>Mark Samaan                                     |
| Hampshire Hospitals NHS Foundation Trust                        | John Gordon<br>Deborah Britton<br>Sarah Cotton<br>Emma Levell<br>Foteini Karagkouni<br>Fiona Kirkham                    |
| Harrogate and District NHS Foundation Trust                     | Ganesh Sivaji<br>Mary Elias<br>Mais Khasawneh                                                                           |
| Hull University Teaching Hospitals NHS Trust                    | Shaji Sebastian<br>Haidee Aleman Gonzalez<br>Jessica Lisle<br>Sally Myers                                               |
| Imperial College Healthcare NHS Trust                           | Lucy Hicks<br>Nick Powell<br>Jonathan Segal<br>Alexander Cole<br>Rishi Fofaria<br>Yousuf Sherifat                       |

|                                                              |                                                                                                                                                    |
|--------------------------------------------------------------|----------------------------------------------------------------------------------------------------------------------------------------------------|
|                                                              | Akram Ali<br>Callum Watson<br>Anita D'Souza<br>Aurélien M Guéroult                                                                                 |
| Kettering General Hospital NHS Foundation Trust              | Ajay M Verma<br>Solange Serna<br>Amjad Ali<br>Mohammad Peerally                                                                                    |
| King's College Hospital NHS Foundation Trust                 | Alexandra Kent<br>Aamir Saifuddin<br>Ali El Rida El Masri<br>Christopher Harlow<br>Martyn Lakeland<br>Hanin Ramadan                                |
| Kingston Hospital NHS Foundation Trust                       | Beverley Kirkham<br>Andres Naranjo<br>Rosaleen Herdman-Grant                                                                                       |
| Lancashire Teaching Hospitals NHS Foundation Trust           | Michael Finegan<br>Liam Morris<br>Joseph Sabine<br>Mutwakil Musharaf                                                                               |
| Leeds Teaching Hospitals NHS Trust                           | Christian Selinger<br>Elaine Ong Ming San<br>Konstantina Rosiou                                                                                    |
| Lewisham and Greenwich NHS Trust                             | Mina Hanna<br>Bo Wang<br>Laura Blackmore<br>Tracy Naughton<br>Samantha Baillie                                                                     |
| Liverpool University Hospitals NHS Foundation Trust          | Sreedhar Subramanian<br>Ashley Bond<br>Philip Smith<br>Tristan Townsend<br>Thomas Conley                                                           |
| London North West University Healthcare NHS Trust            | Ailsa Hart<br>Naila Arebi<br>Lovesh Dyall<br>Sonia Bouri<br>Roosey Sheth<br>Lisa Younge<br>Susie Wen<br>Pineshwari Naeck-Boolaiky<br>Comfort Okpeh |
| Luton and Dunstable University Hospital NHS Foundation Trust | Matthew Johnson<br>Cynthia Kanagasundaram<br>Joya Bhattacharyya<br>Kasamu Kabiru Dawa                                                              |
| Maidstone and Tunbridge Wells NHS Trust                      | Rafid Sikafi<br>Flora Kokwaro<br>Eleanor Warner<br>Maureen Williams<br>Anum Javed                                                                  |
| Manchester University NHS Foundation Trust                   | Simon Borg-Bartolo<br>Karen Kemp<br>Kirsty Nixon<br>Johannah Cook<br>Kirsty Nixon<br>Scott Levison<br>Willow Howard<br>Andrea Au                   |
| Medway NHS Foundation Trust                                  | Nivedita Ghosh<br>Pantong Davwar<br>Olaolu Olabintan                                                                                               |
| Newcastle upon Tyne Hospitals NHS Foundation Trust           | Christopher Andrew Lamb<br>R Alexander Speight<br>Robert Mulligan<br>Andrew King<br>Ruth Owen                                                      |
| NHS Greater Glasgow & Clyde                                  | John Paul Seenan<br>Jonathan MacDonald<br>Roisin Campbell<br>Iona Campbell<br>Chris Curran                                                         |

|                                                      |                                                                                                                                                                                         |
|------------------------------------------------------|-----------------------------------------------------------------------------------------------------------------------------------------------------------------------------------------|
|                                                      | Jayne Saunders                                                                                                                                                                          |
| NHS Lothian                                          | Shahida Din<br>Eleanor Watson<br>Antonia Churchhouse<br>Peter Cartledge<br>Hannah Walton<br>Laura Lucaciu<br>Spyros Siakavellas<br>Gareth-Rhys Jones<br>Victoria Moffat<br>Charlie Lees |
| Northern Health and Social Care Trust                | Kok Leong Diong<br>Leah Gilroy<br>Hannah McCaughan                                                                                                                                      |
| Northern Lincolnshire and Goole NHS Foundation Trust | Shahzad Sarwar<br>Najeebullah Khan<br>Rebecca Perkins<br>Farah Qayyum<br>Caitlin Brown<br>Updesh Singh                                                                                  |
| Nottingham University Hospitals NHS Trust            | Gordon W Moran<br>Shellie Radford<br>Frank Phillips<br>Matthew Shale<br>Ana-Maria Darie                                                                                                 |
| Pennine Acute Hospitals NHS Trust                    | Jimmy Limdi<br>Anish John Kuriakose Kuzhiyanjal<br>Mohammed Korani<br>Ayodele Sasegbon<br>Joanne Taylor                                                                                 |
| Royal Devon & Exeter NHS Foundation Trust            | Nick Kennedy<br>Desmond Chee<br>Keith Pohl                                                                                                                                              |
| Royal Free London NHS Foundation Trust               | Charles Murray<br>Robin Dart<br>Siobhan Rowland<br>Holly Lyne                                                                                                                           |
| Royal Wolverhampton NHS Trust                        | Helen Steed<br>Matthew Brookes<br>Aditi Kumar<br>Kishaani Susecharan<br>Sonika Sethi<br>Precious Aghimien<br>Priya Sarkar<br>Saleha Azhar                                               |
| Salford Royal NHS Foundation Trust                   | Catherine Stansfield<br>Emma Nixon<br>Elizabeth Ratcliffe<br>Abdul Basit<br>Uche Nosegbe                                                                                                |
| Sheffield Teaching Hospitals NHS Foundation Trust    | Alan Lobo<br>Ammar Al-Rifaie<br>Alhassan Ghodeif                                                                                                                                        |
| Shrewsbury and Telford Hospital NHS Trust            | Jeffrey Butterworth<br>Gill Townsend<br>Jad Alkhoury<br>Abdullah Abbasi<br>Nosheen Umar<br>Asima Javed<br>Shukri Abdale                                                                 |
| South Eastern Health & Social Care Trust             | Patrick Allen<br>Tony Tham<br>Neil Bradley<br>Andy Spence                                                                                                                               |
| South Tees Hospitals NHS Foundation Trust            | Arvind Ramadas<br>Anwar Abusrewil<br>Emma Botwright                                                                                                                                     |
| Southend University Hospital NHS Foundation Trust    | Ioannis Koumoutsos<br>Sophie Laverick<br>Vithushan Vakeeswarasarma<br>Donatas Taucius                                                                                                   |
| Southern Health & Social Care Trust                  | Shivaram Bhat<br>Gary Morrison<br>Richard Fox                                                                                                                                           |

|                                                            |                                                                                                                                                                                                                                                        |
|------------------------------------------------------------|--------------------------------------------------------------------------------------------------------------------------------------------------------------------------------------------------------------------------------------------------------|
|                                                            | Christian Frunza<br>Stuart McIlwaine                                                                                                                                                                                                                   |
| St George's University Hospitals NHS Foundation Trust      | Kamal Patel<br>Richard Pollok<br>Nishani Jayasooriya<br>Nicola Grasso                                                                                                                                                                                  |
| St Helens and Knowsley Teaching Hospitals NHS trust        | Rajiv Chandy<br>Reema Jagdish<br>Nirmol Meah<br>Julie Henshaw                                                                                                                                                                                          |
| Stockport NHS Foundation Trust                             | Rachel Campbell                                                                                                                                                                                                                                        |
| Torbay and South Devon NHS Foundation Trust                | Gareth Walker<br>Yuen-Hui Lim<br>James Gulliver                                                                                                                                                                                                        |
| University College London Hospitals NHS Foundation Trust   | Shameer Mehta<br>Gregory Sebepos-Rogers<br>Hazel Wallace                                                                                                                                                                                               |
| University Hospital Southampton NHS Foundation Trust       | Markus Gwiggner<br>Richard Felwick<br>Louise Downey<br>Sohail Rahmany<br>Sara Chughtai<br><br>Radharetnas Meiarasu<br>Bilal Khurshid<br>Tilly Mills                                                                                                    |
| University Hospitals Birmingham NHS Foundation Trust       | Neeraj Bhala<br>Mohammed Nabil Quraishi<br>Adam McCulloch<br>Thomas Troth<br>Rachel Cooney<br>Amar Singh<br>Ridhima Malakar<br>Sara Mahgoub<br>Maria Qurashi<br>Tamsin Critchlow<br>Peter Rimmer<br>Jonathan Cheesbrough<br>Nasir Mir<br>Nasir Hussain |
| University Hospitals Bristol NHS Foundation Trust          | Aileen Fraser<br>Ruth Carr<br>Josiah Carter                                                                                                                                                                                                            |
| University Hospitals Coventry and Warwickshire NHS Trust   | Ramesh Arasaradnam<br>Benjamin Disney<br>Monika Widlak<br>Maria Tabuso                                                                                                                                                                                 |
| University Hospitals of Leicester NHS Trust                | Patricia Hooper<br>Saeed Ahmed<br>Hesham Khalil                                                                                                                                                                                                        |
| University Hospitals of Morecambe Bay NHS Foundation Trust | Sarah Guthrie<br>Wendy Harrison<br>Hayley Owen                                                                                                                                                                                                         |
| West Hertfordshire Hospitals NHS Trust                     | Rakesh Chaudhary<br>Amit Thakor<br>Katharina Wallis<br>Jentus Milton<br>Cheryl Kemp                                                                                                                                                                    |
| Weston Area Health NHS Trust                               | Andrew Bell<br>Fenella Marley<br>Archibald Coulter                                                                                                                                                                                                     |
| Wirral University Teaching Hospital NHS Foundation Trust   | Paul Flanagan<br>Tamar Avades<br>Anne Reddington<br>Fiona Brailsford                                                                                                                                                                                   |

**Supplementary Table 2:** Disease severity indicators

| Disease Severity Markers<br>Median (IQR) <sup>a</sup> | N   | COVID-19 pandemic period cohort<br>(n = 398) | Historical control cohort<br>(n = 384) | Significance<br>P value |
|-------------------------------------------------------|-----|----------------------------------------------|----------------------------------------|-------------------------|
| <b>Day 1</b>                                          |     |                                              |                                        |                         |
| Day 1 stool frequency                                 | 613 | 10.0 (8.0 - 15.0)                            | 10.0 (8.0 - 15.0)                      | 0.57                    |
| Day 1 CRP                                             | 707 | 52.0 (17.0 - 120.0)                          | 54.0 (23.0 - 110.0)                    | 0.86                    |
| Day 1 haemoglobin                                     | 706 | 123.0 (106.0 - 136.0)                        | 123.0 (109.0 - 137.0)                  | 0.28                    |
| Day 1 albumin                                         | 666 | 35.0 (29.0 - 39.0)                           | 37.0 (31.0 - 41.0)                     | <b>0.0036</b>           |
| Day 1 CRP/albumin ratio                               | 662 | 1.6 (0.5 - 3.6)                              | 1.6 (0.6 - 3.3)                        | 0.70                    |
| <b>Day 3</b>                                          |     |                                              |                                        |                         |
| Day 3 stool frequency                                 | 450 | 7.0 (4.0 - 10.0)                             | 6.0 (4.0 - 9.0)                        | 0.21                    |
| Day 3 CRP                                             | 613 | 31.9 (11.0 - 72.0)                           | 31.0 (14.5 - 60.0)                     | 0.70                    |
| Day 3 haemoglobin                                     | 617 | 112.0 (98.0 - 125.0)                         | 116.0 (101.0 - 128.2)                  | 0.12                    |
| Day 3 albumin                                         | 527 | 31.0 (26.0 - 35.5)                           | 33.0 (29.0 - 37.2)                     | <b>0.0048</b>           |
| Day 3 CRP/albumin ratio                               | 519 | 1.1 (0.3 - 2.7)                              | 1.0 (0.4 - 2.2)                        | 0.25                    |
| <b>Day 5</b>                                          |     |                                              |                                        |                         |
| Day 5 stool frequency                                 | 438 | 5.0 (3.0 - 8.0)                              | 4.0 (3.0 - 8.0)                        | 0.72                    |
| Day 5 CRP                                             | 570 | 14.0 (5.0 - 35.0)                            | 15.0 (6.0 - 31.5)                      | 0.82                    |
| Day 5 haemoglobin                                     | 577 | 110.0 (97.8 - 125.0)                         | 115.0 (100.0 - 127.0)                  | 0.063                   |
| Day 5 albumin                                         | 499 | 31.0 (25.0 - 35.0)                           | 32.0 (28.0 - 36.0)                     | <b>0.028</b>            |
| Day 5 CRP/albumin ratio                               | 493 | 0.5 (0.2 - 1.4)                              | 0.5 (0.2 - 1.0)                        | 0.60                    |
| <b>Endoscopic assessment</b>                          |     |                                              |                                        |                         |
| Flexible sigmoidoscopy                                | 758 | 75.5% (289/383)                              | 79.2% (297/375)                        | 0.23                    |
| Day of endoscopic assessment<br>median (IQR)          | 568 | 1.0 (0.0 - 3.0)                              | 2.0 (0.0 - 3.0)                        | 0.10                    |
| Endoscopic Severity<br>% (n/N)                        | 541 |                                              |                                        | 0.50                    |
| Mayo 1                                                |     | 4.9% (13/265)                                | 6.2% (17/276)                          |                         |
| Mayo 2                                                |     | 33.2% (88/265)                               | 36.6% (101/276)                        |                         |
| Mayo 3                                                |     | 61.9% (164/265)                              | 56.9% (157/276)                        |                         |

All values median (interquartile range) unless otherwise stated. IQR = interquartile range; CRP = C- Reactive Protein. P value = Fisher's exact test or Mann-Whitney U test for discrete and continuous variables continuous, respectively.

<sup>a</sup> Units for variables: CRP - mg/L; albumin - g/L; haemoglobin - g/L; stool frequency - stools per 24 hours.

**Supplementary Table 3:** Table of post-operative complications

| Variable                                                                          | N   | COVID-19 pandemic period cohort (n= 398) | Historic control cohort (n= 384) | Significance P value |
|-----------------------------------------------------------------------------------|-----|------------------------------------------|----------------------------------|----------------------|
| Required emergency surgery for ASUC                                               | 764 | 16.5% (64/389)                           | 13.3% (50/375)                   | 0.26                 |
| Post-operative ITU stay required                                                  | 102 | 31.6% (18/57)                            | 31.1% (14/45)                    | 1.0                  |
| Post-operative complications?                                                     | 107 | 37.3% (22/59)                            | 29.2% (14/48)                    | 0.42                 |
| Gastrointestinal complication(s)                                                  | 782 | 2.0% (8/398)                             | 1.8% (7/384)                     | 1.0                  |
| Wound complication(s)                                                             | 782 | 1.3% (5/398)                             | 0.0% (0/384)                     | 0.062                |
| Infective complication(s)                                                         | 782 | 2.3% (9/398)                             | 1.3% (5/384)                     | 0.42                 |
| Renal and Endocrine complication(s)                                               | 782 | 0.3% (1/398)                             | 0.0% (0/384)                     | 1.0                  |
| Cardiovascular disorder(s)                                                        | 782 | 0.0% (0/398)                             | 0.0% (0/384)                     | NA                   |
| Pulmonary complication(s)                                                         | 782 | 0.5% (2/398)                             | 0.3% (1/384)                     | 1.0                  |
| Neurological disorder(s)                                                          | 782 | 0.3% (1/398)                             | 0.0% (0/384)                     | 1.0                  |
| Small bowel obstruction                                                           | 782 | 0.3% (1/398)                             | 0.0% (0/384)                     | 1.0                  |
| Anastomotic stricture (includes peritoneal adhesions)                             | 782 | 0.0% (0/398)                             | 0.0% (0/384)                     | NA                   |
| Pouch leak/Pouch failure                                                          | 782 | 0.3% (1/398)                             | 0.0% (0/384)                     | 1.0                  |
| Bowel perforation                                                                 | 782 | 0.3% (1/398)                             | 0.0% (0/384)                     | 1.0                  |
| Ileus                                                                             | 782 | 0.8% (3/398)                             | 0.8% (3/384)                     | 1.0                  |
| Ischaemic bowel                                                                   | 782 | 0.0% (0/398)                             | 0.0% (0/384)                     | NA                   |
| GI bleeding                                                                       | 782 | 0.0% (0/398)                             | 0.3% (1/384)                     | 0.49                 |
| Ileostomy / colostomy complication or malfunction                                 | 782 | 0.3% (1/398)                             | 0.8% (3/384)                     | 0.37                 |
| Digestive organ disorders (includes acute hepatic failure and acute pancreatitis) | 782 | 0.0% (0/398)                             | 0.0% (0/384)                     | NA                   |
| Fistula                                                                           | 782 | 0.0% (0/398)                             | 0.0% (0/384)                     | NA                   |
| Hematoma/seroma                                                                   | 782 | 0.0% (0/398)                             | 0.0% (0/384)                     | NA                   |
| Wound dehiscence and Delayed wound healing                                        | 782 | 1.3% (5/398)                             | 0.0% (0/384)                     | 0.062                |
| Iatrogenic injuries (includes foreign body accidentally left during procedure)    | 782 | 0.0% (0/398)                             | 0.0% (0/384)                     | NA                   |
| Sepsis and bacteraemia                                                            | 782 | 1.3% (5/398)                             | 0.8% (3/384)                     | 0.73                 |
| Abscess                                                                           | 782 | 1.0% (4/398)                             | 0.8% (3/384)                     | 1.0                  |
| Wound infection                                                                   | 782 | 0.3% (1/398)                             | 0.0% (0/384)                     | 1.0                  |
| Urinary tract infection                                                           | 782 | 0.0% (0/398)                             | 0.0% (0/384)                     | NA                   |
| Pneumonia and empyema                                                             | 782 | 0.8% (3/398)                             | 0.0% (0/384)                     | 0.25                 |
| Acute renal failure                                                               | 782 | 0.0% (0/398)                             | 0.0% (0/384)                     | NA                   |
| Fluid and electrolyte disorders (includes hypokalaemia)                           | 782 | 0.0% (0/398)                             | 0.0% (0/384)                     | NA                   |
| Severe endocrine disorders (includes adrenal disorders, hypoglycaemic coma)       | 782 | 0.3% (1/398)                             | 0.0% (0/384)                     | 1.0                  |
| Retention of urine                                                                | 782 | 0.0% (0/398)                             | 0.0% (0/384)                     | NA                   |
| Thrombosis/embolism                                                               | 782 | 0.0% (0/398)                             | 0.0% (0/384)                     | NA                   |
| Myocardial infarction                                                             | 782 | 0.0% (0/398)                             | 0.0% (0/384)                     | NA                   |
| Cardiac arrest                                                                    | 782 | 0.0% (0/398)                             | 0.0% (0/384)                     | NA                   |
| Hypotension or shock                                                              | 782 | 0.0% (0/398)                             | 0.0% (0/384)                     | NA                   |
| Cardiac arrhythmias (excludes tachycardia)                                        | 782 | 0.0% (0/398)                             | 0.0% (0/384)                     | NA                   |
| Heart failure                                                                     | 782 | 0.0% (0/398)                             | 0.0% (0/384)                     | NA                   |
| Bleeding                                                                          | 782 | 1.0% (4/398)                             | 0.3% (1/384)                     | 0.37                 |
| Haematoma                                                                         | 782 | 0.3% (1/398)                             | 0.0% (0/384)                     | 1.0                  |
| Infection                                                                         | 782 | 3.5% (14/398)                            | 1.3% (5/384)                     | 0.061                |
| Intestinal leak                                                                   | 782 | 0.3% (1/398)                             | 0.5% (2/384)                     | 0.62                 |
| Rectal stump blow out                                                             | 782 | 0.5% (2/398)                             | 0.0% (0/384)                     | 0.50                 |
| Ileus                                                                             | 782 | 1.3% (5/398)                             | 0.8% (3/384)                     | 0.73                 |
| Thromboembolism (deep vein thrombosis or pulmonary embolus)                       | 769 | 0.3% (1/385)                             | 0.0% (0/384)                     | 1                    |
| High stoma output                                                                 | 769 | 0.5% (2/385)                             | 0.5% (2/384)                     | 1                    |



**Supplementary Table 4:** UVA and MVA for composite endpoint of rescue therapy (including primary induction) or surgery using Day 1 and Day 3 variables

| Term                                    | Day 1 variables<br>UVA |              |         | Day 1 variables<br>MVA |              |         | Day 3 variables<br>UVA |              |         | Day 3 variables<br>MVA |              |         |
|-----------------------------------------|------------------------|--------------|---------|------------------------|--------------|---------|------------------------|--------------|---------|------------------------|--------------|---------|
|                                         | OR                     | OR 95%CI     | P value |
| <b>Cohort type:<br/>historic cohort</b> | 0.60                   | 0.43 to 0.82 | 0.0015  | 0.63                   | 0.44 to 0.89 | 0.0083  | 0.60                   | 0.43 to 0.82 | 0.0015  | 0.72                   | 0.45 to 1.16 | 0.18    |
| <b>Stool frequency</b>                  | 1.04                   | 1.01 to 1.07 | 0.017   | 1.04                   | 1.00 to 1.07 | 0.034   | 1.19                   | 1.13 to 1.26 | <0.0001 | 1.19                   | 1.11 to 1.27 | <0.0001 |
| <b>Log[CRP]</b>                         | 1.08                   | 0.95 to 1.22 | 0.23    | 0.95                   | 0.77 to 1.16 | 0.59    | 1.17                   | 1.03 to 1.34 | 0.020   | 1.04                   | 0.81 to 1.38 | 0.81    |
| <b>Haemoglobin</b>                      | 1.01                   | 1.00 to 1.01 | 0.10    | 1.01                   | 1.00 to 1.02 | 0.016   | 1.00                   | 1.00 to 1.01 | 0.30    | 1.02                   | 1.01 to 1.04 | 0.0085  |
| <b>Albumin</b>                          | 0.96                   | 0.94 to 0.99 | 0.0035  | 0.96                   | 0.93 to 0.99 | 0.023   | 0.95                   | 0.92 to 0.97 | 0.00029 | 0.93                   | 0.89 to 0.97 | 0.0023  |
| <b>CRP/albumin</b>                      | 1.11                   | 1.04 to 1.18 | 0.0026  | 1.09                   | 0.98 to 1.22 | 0.14    | 1.00                   | 0.96 to 1.02 | 0.69    | 0.96                   | 0.82 to 1.01 | 0.55    |

MVA = multivariable analysis; UVA = univariable analysis; OR = odds ratio; OR 95% = 95% confidence interval for odds ratio  
 Units for variables: CRP - mg/L; albumin – g/L; haemoglobin - g/L; stool frequency - stools per 24 hours

**Supplementary Table 5:** Details of ASUC patients testing positive for COVID-19 during or within 3 months of presentation

| Age, gender, ethnicity  | Co-morbidity                     | Baseline medications                     | Treatments for ASUC                         | Rescue therapy | COVID-19 PCR days from index admission, imaging changes, outcomes            | Treatment during follow up                   |
|-------------------------|----------------------------------|------------------------------------------|---------------------------------------------|----------------|------------------------------------------------------------------------------|----------------------------------------------|
| 30 years, Male, Black   | None                             | 5-ASA oral<br>5-ASA topical              | IV steroids,<br>Oral 5-ASA                  | Nil            | 1 day,<br>No imaging changes,<br>No serious outcomes                         | Oral steroids,<br>Azathioprine               |
| 53 years, Male, Asian   | Current malignancy               | No prior treatment                       | Oral 5-ASA,<br>Rectal 5-ASA,<br>IV steroids | Infliximab     | 1 day,<br>No imaging changes,<br>No serious outcomes                         | 5-ASAs,<br>Infliximab,<br>Steroids           |
| 75 years, Female, White | Diabetes                         | No prior treatment                       | Oral 5-ASA,<br>Rectal 5-ASA,<br>IV steroids | Nil            | 7 days,<br>No imaging changes,<br>No serious outcomes                        | Oral steroids,<br>Oral 5-ASAs                |
| 66 years, Female, White | Diabetes                         | No prior treatment                       | IV steroids,<br>Oral -ASAs                  | Infliximab     | 2 days,<br>No imaging changes,<br>No serious outcomes                        | Oral 5-ASAs,<br>Oral Steroids,<br>Infliximab |
| 37 years, Female White  | Asthma                           | Oral 5-ASA<br>Azathioprine<br>Infliximab | IV steroids                                 | Tofacitinib    | 1 day<br>No imaging changes,<br>No serious outcomes                          | Colectomy 31 days after index admission      |
| 75 years, Male, White   | COPD,<br>CVD,<br>HTN,<br>Obesity | Oral 5-ASA                               | IV steroids,<br>Oral 5-ASA                  | Nil            | 28 days (12 days post discharge),<br>Imaging changes,<br>No serious outcomes | Oral steroids,<br>Oral 5-ASAs                |
| 60 years, Male Asian    | HTN<br>Diabetes                  | Oral 5-ASA<br>Azathioprine               | IV steroids<br>Oral 5-ASA                   | Nil            | 17 days (5 days post discharge)<br>Imaging changes,<br>No serious outcomes   | Oral steroids<br>Oral 5- ASA<br>Infliximab   |

5-ASA = 5- aminosalicylic acid; COPD = chronic obstructive pulmonary disease; CVD = cardiovascular disease; HTN = hypertension

**Supplementary Table 6:** Pre-ASUC and post-ASUC COVID-19 shielding and risk assessment

| Variable                                                                        | COVID-19 pandemic period cohort (N = 398) |
|---------------------------------------------------------------------------------|-------------------------------------------|
| <b>Social distancing measures pre-ASUC</b>                                      |                                           |
| No social distancing measures                                                   | 12.6% (49/388)                            |
| Social distancing                                                               | 23.7% (92/388)                            |
| Stringent social distancing                                                     | 9.8% (38/388)                             |
| Shielding                                                                       | 20.6% (80/388)                            |
| Unknown                                                                         | 33.2% (129/388)                           |
| <b>COVID-19 risk according to British Society of Gastroenterology risk grid</b> |                                           |
| Lowest                                                                          | 34.3% (133/388)                           |
| Moderate                                                                        | 26.3% (102/388)                           |
| Highest                                                                         | 39.4% (153/388)                           |
| <b>Shielding in the 3-month follow up period after ASUC</b>                     |                                           |
| No                                                                              | 10.6% (31/292)                            |
| Advised to shield - unclear whether advice followed                             | 34.9% (102/292)                           |
| Yes, confirmed to have shielded                                                 | 17.5% (51/292)                            |
| Unsure                                                                          | 37.0% (108/292)                           |

**Supplementary Figure 1: Study cohorts**

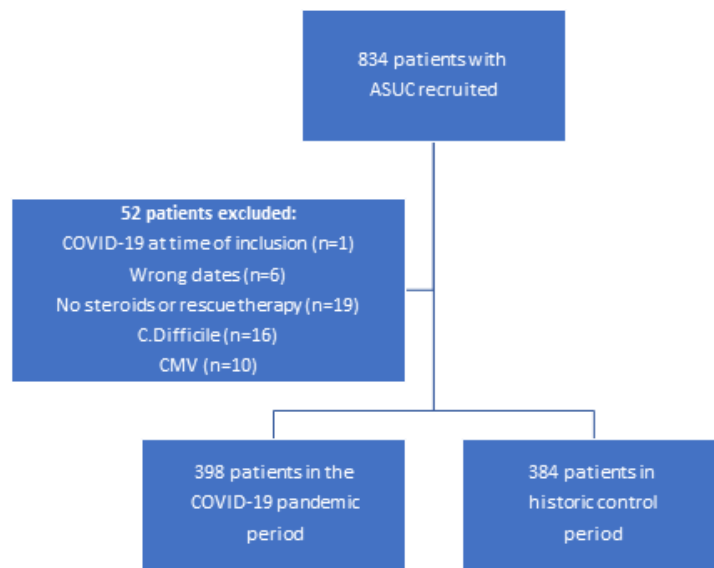

C. difficile = Clostridium difficile  
CMV IgM positive and IgG negative inferred as acute CMV infection

**Supplementary Figure 2: A. Outcomes in COVID-19 pandemic cohort and B. Historical control cohort**

**A**

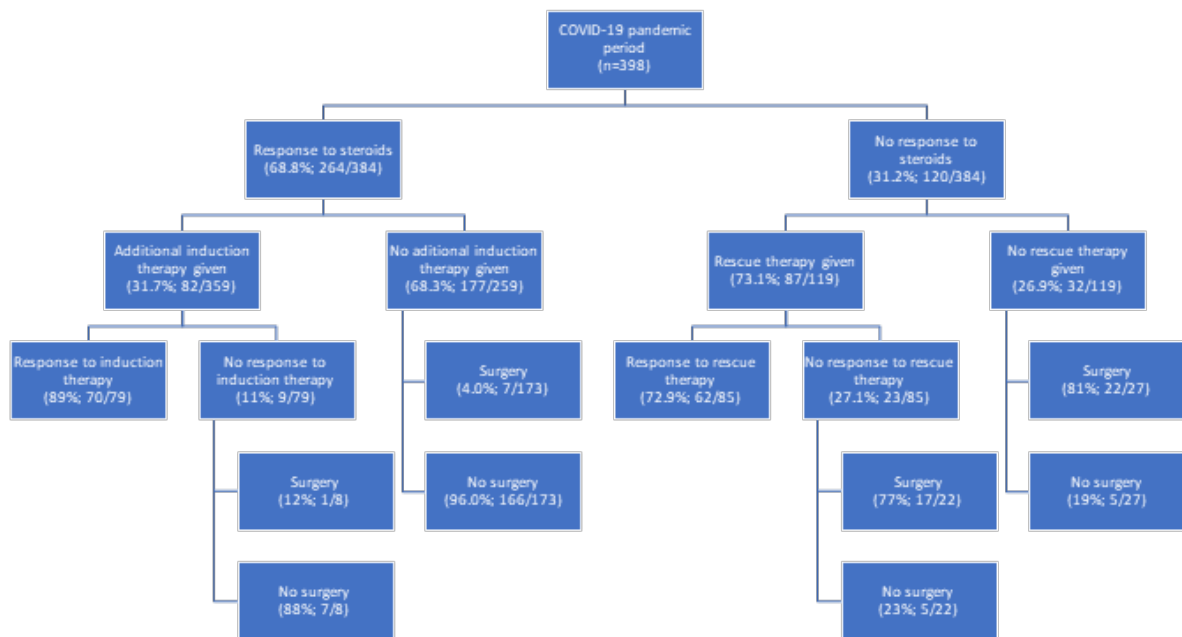

**B**

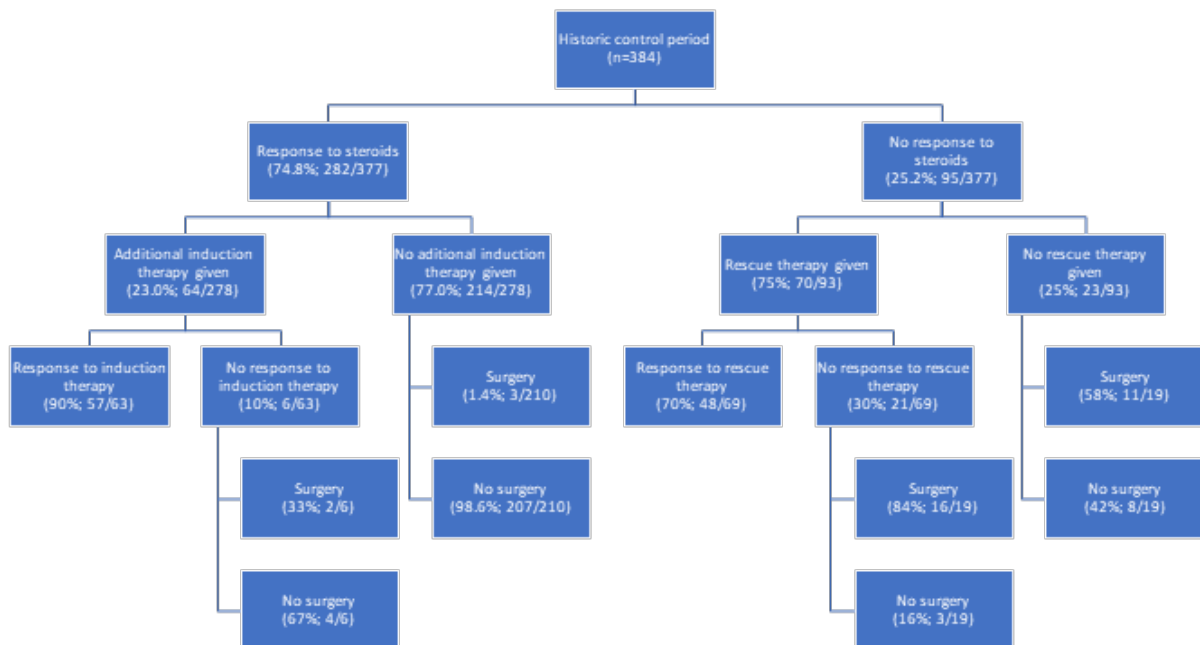

Supplement: mmc1.pdf [file mmc1.pdf]
